# Supplementary material for: Cardiac autonomic neuropathy and risk of cardiovascular disease and mortality in type 1 and type 2 diabetes: a meta-analysis
Source: HighWire-hosted journal article supplement (doi:10.1136/bmjdrc-2021-002480), 2021-12-01

**ESM – Extended supplementary material****ESM Table 1** Search terms

| <b>Cardiac autonomic neuropathy (CAN)</b>                                                                                                                                                                                                                                                                                                                                                                                                                                                                                                                                                                                                                                                                                                                  | <b>Cardiovascular disease events</b>                                                                                                                                                                                                                                                                                                                                                                                                                                                                                                                                                                                                                     | <b>Mortality</b>                                                                                                                                                    |
|------------------------------------------------------------------------------------------------------------------------------------------------------------------------------------------------------------------------------------------------------------------------------------------------------------------------------------------------------------------------------------------------------------------------------------------------------------------------------------------------------------------------------------------------------------------------------------------------------------------------------------------------------------------------------------------------------------------------------------------------------------|----------------------------------------------------------------------------------------------------------------------------------------------------------------------------------------------------------------------------------------------------------------------------------------------------------------------------------------------------------------------------------------------------------------------------------------------------------------------------------------------------------------------------------------------------------------------------------------------------------------------------------------------------------|---------------------------------------------------------------------------------------------------------------------------------------------------------------------|
| <ul style="list-style-type: none"> <li>• Diabetic neuropathy [MeSH Terms]</li> <li>• Autonomic nervous system diseases [MeSH Terms]</li> <li>• Cardiac autonomic neuropathy</li> <li>• Cardiovascular autonomic dysfunction</li> <li>• Autonomic neuropathy</li> <li>• Abnormal heart rate variability</li> <li>• Autonomic Function Tests</li> <li>• Cardiac autonomic function tests</li> <li>• Cardiovascular autonomic reflex tests</li> <li>• Severe cardiac autonomic neuropathy</li> <li>• 30:15 ratio</li> <li>• E/I</li> <li>• E:I</li> <li>• Valsalva ratio</li> <li>• Heart rate response to deep breathing</li> <li>• Resting heart rate variability</li> <li>• Sympathetic nervous system overactivity</li> <li>• SNS overactivity</li> </ul> | <ul style="list-style-type: none"> <li>• Heart Arrest[MeSH Terms]</li> <li>• heart failure[MeSH Terms]</li> <li>• Heart Failure [MeSH]</li> <li>• embolism[Mesh]</li> <li>• myocardial ischemia[MeSH Terms]</li> <li>• Brain Ischemia[Mesh]</li> <li>• Intracranial Embolism and Thrombosis[Mesh]</li> <li>• thromboembolism [Mesh]</li> <li>• thrombosis [Mesh]</li> <li>• Stroke[Mesh]</li> <li>• CVD</li> <li>• CHD</li> <li>• NSTEMI</li> <li>• Cerebrovascular accident</li> <li>• Brainstem</li> <li>• Thrombosis</li> <li>• Heart attack</li> <li>• Silent Myocardial ischaemia</li> <li>• Silent myocardial infarction</li> <li>• PCI</li> </ul> | <ul style="list-style-type: none"> <li>• Mortality</li> <li>• Cardiovascular mortality</li> <li>• Perioperative mortality</li> <li>• All-cause mortality</li> </ul> |

|                                                                                                                                                                                                                     |                                                                                                                                                                                                                                                                          |  |
|---------------------------------------------------------------------------------------------------------------------------------------------------------------------------------------------------------------------|--------------------------------------------------------------------------------------------------------------------------------------------------------------------------------------------------------------------------------------------------------------------------|--|
| <ul style="list-style-type: none"> <li>• Vagus nerve denervation</li> <li>• Sudomotor function</li> <li>• R-R interval variation</li> <li>• Diabetic neuropathy</li> <li>• Diabetic autonomic neuropathy</li> </ul> | <ul style="list-style-type: none"> <li>• Percutaneous coronary intervention</li> <li>• MACE</li> <li>• Perioperative myocardial infarction</li> <li>• Cardiovascular disease</li> <li>• Stroke</li> <li>• Brain ischemia</li> <li>• Vascular</li> <li>• STEMI</li> </ul> |  |
|---------------------------------------------------------------------------------------------------------------------------------------------------------------------------------------------------------------------|--------------------------------------------------------------------------------------------------------------------------------------------------------------------------------------------------------------------------------------------------------------------------|--|

### ESM Table 2 Tests for autonomic function

| Autonomic function tests (AFT)                                                                                                                                                                                                                                                                                                                                                                                                                                                                                                                   |
|--------------------------------------------------------------------------------------------------------------------------------------------------------------------------------------------------------------------------------------------------------------------------------------------------------------------------------------------------------------------------------------------------------------------------------------------------------------------------------------------------------------------------------------------------|
| <ul style="list-style-type: none"> <li>• Heart-rate response to the Valsalva manoeuvre (Valsalva ratio)</li> <li>• Heart-rate response to deep breathing shown by the Expiratory/Inspiratory (E/I) ratio</li> <li>• Heart-rate response to standing at 30 seconds and 15 seconds (30:15 ratio)</li> <li>• BP response to standing (mmHg)</li> <li>• BP response to sustained handgrip (mmHg)</li> <li>• Heart rate variation (HRV)</li> <li>• Spectral power analysis (of high frequency, very low frequency and low-frequency bands)</li> </ul> |

**ESM Table 3** Participant demographic characteristics information from all final selected articles

| Study                           | Country                             | Study design | Type of diabetes  | Age (years)                                                    | Gender (M/F)                                                      |
|---------------------------------|-------------------------------------|--------------|-------------------|----------------------------------------------------------------|-------------------------------------------------------------------|
| Chen et al, 2001(32)            | Taiwan                              | Cohort study | Type 2            | CAN-: 61.3 +/- 11.4<br><br>CAN+: 64.2 +/- 10.1                 | CAN-:<br>171/70<br>(71%/29%)<br><br>CAN+:<br>260/111<br>(70%/30%) |
| Ko et al, 2008 (25)             | Korea                               | Cohort study | Type 2            | Mean age of total study population: 58.1+/-10.7                | Total study population: 431/695 (38%/62%)                         |
| Pop-Busui et al, 2017 (15)      | America and Canada                  | Cohort study | Type 1            | CAN-: 33+/-7.0<br><br>CAN+: 37+/-7.0                           | CAN-:<br>674/588<br>(53%/47%)<br><br>CAN+:<br>61/70<br>(47%/53%)  |
| Vujosevic et al, 2012 (30)      | Montenegro                          | Cohort study | Type 2            | Mean age of the total study population: 64.08+/-9.06           | Total study population: 43/33 (57%/43%)                           |
| Valensi et al, 2001 (20)        | France                              | Cohort study | Type 1 and Type 2 | Mean age of the total study population: 54.7 (range 30.0-70.0) | NA                                                                |
| Soedamah-muthu et al, 2008 (13) | 31 centres in 16 European countries | Cohort study | Type 1            | Mean age of the total study population: 33.0 (range 15.0-61.0) | Total study population: 1421/1366 (51%/49%)                       |
| O'Brien et al, 1991 (22)        | England                             | Cohort study | Type 1            | CAN-: 45.0+/-18.0<br><br>CAN+: 46.0+/- 15.0                    | CAN-:<br>245/167<br>(59%/41%)<br><br>CAN+:<br>36/48<br>(43%/57%)  |
| Lee et al, 2003 (19)            | Korea                               | Cohort study | Type 2            | CAN-: 58.0+/-10.0<br><br>CAN+: 65.0+/-8.0                      | NA                                                                |
| Ewing et al, 1980 (18)          | Scotland                            | Cohort study | NA                | Mean age of the total study                                    | CAN-: 33/0 (100%/0%)                                              |

|                          |             |              |        |                                                                                           |                                                                                                             |
|--------------------------|-------------|--------------|--------|-------------------------------------------------------------------------------------------|-------------------------------------------------------------------------------------------------------------|
|                          |             |              |        | population: 46.1 (range 24.0-69.0)                                                        | CAN+: 29/11 (73%/27%)                                                                                       |
| Cha et al, 2016 (31)     | South Korea | Cohort study | Type 2 | Mean age of the total study population: 62.5+/- 8.7                                       | Total study population: 65/94 (41%/59%)                                                                     |
| Astrup et al, 2006 (24)  | Denmark     | Cohort study | Type 1 | Diabetic nephropathy group: 41.0+/-9.0<br>Without diabetic nephropathy group: 43.0+/-10.0 | Total study population: 237/151 (61%/39%)                                                                   |
| Lykke et al, 2008 (26)   | Denmark     | Cohort study | Type 1 | Normoalbuminuric group (n=192): 42.7+/-10.2<br>Nephropathy group (n=199): 40.9+/-9.6      | Total study population: 240/151 (61%/39%)                                                                   |
| Cohen et al, 2003 (23)   | America     | Cohort study | Type 2 | Stroke (endpoint) group: 62.3+/-6.9<br>no stroke (endpoint) group: 58.4+/-8.4             | Male stroke (endpoint) group: 24/17 (59%/41%)<br>No stroke (endpoint) group: 555/354 (61%/39%)              |
| Okada et al, 2010 (29)   | Japan       | Cohort study | Type 2 | Preserved BRS = 55.6+/-10.5<br>Depressed BRS = 60.6+/-12.0                                | Preserved BRS: 63/36 (64%/36%)<br>Depressed BRS: 31/54 (36%/64%)<br>Total study population: 94/90 (51%/49%) |
| Navarro et al, 1996 (34) | America     | Cohort study | Type 1 | Mean age of the total study population: 33.4+/-9.0                                        | Total study population: 244/301 (45%/55%)                                                                   |

|                          |                                            |                              |        |                                                                                 |                                                                                             |
|--------------------------|--------------------------------------------|------------------------------|--------|---------------------------------------------------------------------------------|---------------------------------------------------------------------------------------------|
| Sampson et al 1990 (21)  | England                                    | Cohort study                 | Type 1 | Group A: 37.1+/-1.2<br>Group B: 39.5+/-1.7<br>Group C: 35.5+/-1.3               | Group A: 23/26 (47%/53%)<br>Group B: 10/14 (42%/58%)<br>Group C: 22/16 (58%/42%)            |
| Töyry et al, 1996 (14)   | Finland                                    | Cohort study                 | Type 2 | NA                                                                              | Total study population: 70/63 (53%/47%)                                                     |
| Veglio et al, 2000 (38)  | Italy                                      | Cohort study                 | Type 1 | NA                                                                              | Total diabetic population: 196/183 (52%/48%)                                                |
| Ziegler et al, 2008 (17) | Germany                                    | Cohort study                 | NA     | Mean age of the total study population: 65.2+/-5.5                              | Total diabetic population: 82/78 (51%/49%)                                                  |
| Sawicki et al, 1996 (36) | Germany                                    | Cohort study                 | Type 1 | Mean age of the total study population: 40.0+/-11.0                             | Total study population: 50/35 (59%/41%)                                                     |
| Young et al, 2009 (27)   | 14 centres in the United States and Canada | Cohort study                 | Type 2 | No screening (n=562) group: 60.8 +/-6.4<br>Screening (n=561) group: 60.7 +/-6.7 | No screening (n=562) group: 311/251 (55%/45%)<br>Screening (n=561) group: 290/271 (52%/48%) |
| Sawicki et al, 1998 (37) | Germany                                    | Case-control follow up study | Type 2 | Median age of the total study population: 63.0 (interquartile range 54.0–71.0)  | Total study population: 68/148 (31%/69%)                                                    |

|                            |                    |              |                   |                                                                |                                                                                                                                                  |
|----------------------------|--------------------|--------------|-------------------|----------------------------------------------------------------|--------------------------------------------------------------------------------------------------------------------------------------------------|
| Pop-Busui et al, 2010 (28) | America and Canada | Cohort study | Type 2            | CAN1: 62.5+/-6.7<br>CAN-: 61.9+/-6.7                           | CAN1: 288/284 (50%/50%)<br><br>CAN-: 4606/2957 (61%/39%)                                                                                         |
| Rathmann et al, 1993 (35)  | Germany            | Cohort study | Type 1 and type 2 | CAN-: 42.9+/-12.0<br>CAN+: 43.3+/-12.0                         | CAN-: 12/23 (34%/66%)<br><br>CAN+: 12/23 (34%/66%)                                                                                               |
| Ewing et al, 1976 (16)     | Scotland           | Cohort study | NA                | Mean age of the total study population: 47.0 (range 24.0-63.0) | 31/6 (84%/16%) initially. 30 patients were re-examined 18 months to 2 years after initial selection for CAN, but sex was not available for them. |
| Jermendy et al, 1991 (33)  | Hungary            | Cohort study | Type 1 and type 2 | Mean age of diabetic population: 46.3+/-1.7                    | Total diabetic population: 35/18 (66%/34%)                                                                                                       |

\*CAN, cardiac autonomic neuropathy; CAN+, cardiac autonomic neuropathy positive; CAN-, cardiac autonomic neuropathy negative; NA, information not available

**ESM Table 4** Participant cardiovascular disease event and mortality rates

| Study                 | Follow-up (years) | AFT method of assessment                                                                                                                                                                                                               | Definition of CAN                                                 | Cardiovascular disease events definition | Cardiovascular disease events % (CAN +) | Cardiovascular disease events % (CAN -) | Mortality % (CAN +) | Mortality % (CAN -) |
|-----------------------|-------------------|----------------------------------------------------------------------------------------------------------------------------------------------------------------------------------------------------------------------------------------|-------------------------------------------------------------------|------------------------------------------|-----------------------------------------|-----------------------------------------|---------------------|---------------------|
| Chen et al, 2001 (32) | 7.7               | 1) Heart rate response to a single deep breath.<br>2) Heart rate response to 6 consecutive breaths.<br>3) Heart rate response to standing.<br>4) Blood pressure response to standing.<br>5) Heart rate response to Valsalva manoeuvre. | Defined by scoring 3 or more following unique diagnostic criteria | NA                                       | NA                                      | NA                                      | 106/371 (29%)       | 29/241 (12%)        |
| Ko et al, 2008 (25)   | 7.1               | 1) E/I ratio<br>2) 30:15 ratio<br>3) Heart rate response to Valsalva manoeuvre                                                                                                                                                         | Defined based on at least one abnormal standard test              | 1) New onset of ischaemic stroke         | 97/627 (15%)                            | 34/499 (7%)                             | NA                  | NA                  |

|                            |                                                                                                                                                        |                                                                                                                                  |                                                                                                                                                                                                        |                                                                                                                                                                                                                                                                                                                                                                                                                                                              |              |                |                                                        |                                                          |
|----------------------------|--------------------------------------------------------------------------------------------------------------------------------------------------------|----------------------------------------------------------------------------------------------------------------------------------|--------------------------------------------------------------------------------------------------------------------------------------------------------------------------------------------------------|--------------------------------------------------------------------------------------------------------------------------------------------------------------------------------------------------------------------------------------------------------------------------------------------------------------------------------------------------------------------------------------------------------------------------------------------------------------|--------------|----------------|--------------------------------------------------------|----------------------------------------------------------|
| Pop-Busui et al, 2017 (15) | 3–9 years (mean 6.5 years). In 1994, 96% of the surviving DCCT cohort enrolled in the EDIC observational study in an additional 20 years of follow-up. | <p>1) R-R variation in response to paced breathing</p> <p>2) Valsalva manoeuvre</p> <p>3) Postural changes in blood pressure</p> | Defined as either an R-R variation <15 or an R-R variation 15–19.9 in combination with a Valsalva ratio ≤1.5 or a decrease of >10 mmHg in diastolic blood pressure upon and while standing for 10 min. | <p>1) Nonfatal myocardial infarction or stroke</p> <p>2) death judged to be secondary to CVE</p> <p>3) subclinical (“silent”) myocardial infarction</p> <p>4) Angina confirmed by ischemic changes with exercise tolerance testing or by clinically significant obstruction on coronary angiography</p> <p>5) Congestive heart failure with paroxysmal nocturnal dyspnoea, orthopnoea, or marked limitation of physical activity caused by heart disease</p> | 49/131 (37%) | 191/1262 (15%) | 4/131 (3%)<br>*death from cardiovascular diseases only | 13/1262 (1%)<br>*death from cardiovascular diseases only |
|----------------------------|--------------------------------------------------------------------------------------------------------------------------------------------------------|----------------------------------------------------------------------------------------------------------------------------------|--------------------------------------------------------------------------------------------------------------------------------------------------------------------------------------------------------|--------------------------------------------------------------------------------------------------------------------------------------------------------------------------------------------------------------------------------------------------------------------------------------------------------------------------------------------------------------------------------------------------------------------------------------------------------------|--------------|----------------|--------------------------------------------------------|----------------------------------------------------------|



|  |  |  |  |                                                                                                                                                                                            |  |  |  |  |
|--|--|--|--|--------------------------------------------------------------------------------------------------------------------------------------------------------------------------------------------|--|--|--|--|
|  |  |  |  | 6)Revascularization with angioplasty and/ or coronary artery bypass.<br><br>7)Major adverse cardiovascular events (MACE) defined as nonfatal myocardial infarction or stroke or CVD death. |  |  |  |  |
|--|--|--|--|--------------------------------------------------------------------------------------------------------------------------------------------------------------------------------------------|--|--|--|--|

|                            |                                                                                                                                                                                                                                                                                       |                                                                                                                                                                                                  |                                                                                                                                                                                                                                                                        |    |                                                                       |                                                                      |             |            |
|----------------------------|---------------------------------------------------------------------------------------------------------------------------------------------------------------------------------------------------------------------------------------------------------------------------------------|--------------------------------------------------------------------------------------------------------------------------------------------------------------------------------------------------|------------------------------------------------------------------------------------------------------------------------------------------------------------------------------------------------------------------------------------------------------------------------|----|-----------------------------------------------------------------------|----------------------------------------------------------------------|-------------|------------|
| Vujosevic et al, 2012 (30) | 13<br>*CAN (n=51) and control (n=25) population was 76 in total intrahospital, however 8 died intrahospital and it isn't stated how many were CAN patients vs control. Therefore, cannot work out how many CAN vs control patients were part of the extra hospital 10 year follow-up. | 1)Heart rate responses to the Valsalva manoeuvre<br><br>2)Standing up and deep breathing<br><br>3)Blood pressure responses to standing up<br><br>4)Blood pressure response to sustained handgrip | Defined as normal (all tests normal), early (one heart rate test abnormal), definite (two or more heart rate tests abnormal), severe (abnormal heart rate tests plus one or both blood pressure tests abnormal), or atypical (any other combination of abnormalities). | NA | 16/51 (31%)<br>*only includes cardiovascular events that led to death | 4/25 (16%)<br>*only includes cardiovascular events that led to death | 24/51 (47%) | 5/25 (20%) |
|----------------------------|---------------------------------------------------------------------------------------------------------------------------------------------------------------------------------------------------------------------------------------------------------------------------------------|--------------------------------------------------------------------------------------------------------------------------------------------------------------------------------------------------|------------------------------------------------------------------------------------------------------------------------------------------------------------------------------------------------------------------------------------------------------------------------|----|-----------------------------------------------------------------------|----------------------------------------------------------------------|-------------|------------|

|                          |     |                                                                                                                                                          |                                                                                                            |                                                                                                                                                                                                                                                                                                                                                  |             |           |    |    |
|--------------------------|-----|----------------------------------------------------------------------------------------------------------------------------------------------------------|------------------------------------------------------------------------------------------------------------|--------------------------------------------------------------------------------------------------------------------------------------------------------------------------------------------------------------------------------------------------------------------------------------------------------------------------------------------------|-------------|-----------|----|----|
| Valensi et al, 2001 (20) | 4.5 | <p>1) Heart rate response to the Valsalva manoeuvre</p> <p>2) Heart rate response to 6 consecutive breaths</p> <p>3) Heart rate response to standing</p> | The results of the three tests were compared with those from a control series with age taken into account. | <p>1)Death of cardiac origin (sudden death or death caused by MI or congestive heart failure)</p> <p>2)Nonfatal MI (MI was considered to be a major event whether the patient was hospitalized or not)</p> <p>3)Heart failure</p> <p>4)Resuscitation from ventricular tachycardia/fibrillation</p> <p>5)Need for coronary revascularization.</p> | 22/33 (67%) | 3/42 (7%) | NA | NA |
|--------------------------|-----|----------------------------------------------------------------------------------------------------------------------------------------------------------|------------------------------------------------------------------------------------------------------------|--------------------------------------------------------------------------------------------------------------------------------------------------------------------------------------------------------------------------------------------------------------------------------------------------------------------------------------------------|-------------|-----------|----|----|

|                                 |   |                                                              |                                                                                                                                                                                                                                                                                                     |    |    |    |                                                                   |              |
|---------------------------------|---|--------------------------------------------------------------|-----------------------------------------------------------------------------------------------------------------------------------------------------------------------------------------------------------------------------------------------------------------------------------------------------|----|----|----|-------------------------------------------------------------------|--------------|
| Soedamah-Muthu et al, 2008 (13) | 7 | 1) Loss of heart rate variability<br>2) Postural hypotension | 1) Loss of heart rate variability with an RR ratio of <1.04 and/or postural hypotension with a fall in systolic blood pressure of $\geq 20$ mmHg.<br><br>2) At least two abnormal tests with a RR ratio of <1.04 and postural hypotension with a fall in systolic blood pressure of $\geq 30$ mmHg. | NA | NA | NA | CAN definition 1: 59/877 (7%)<br><br>CAN definition 2: 9/64 (14%) | 34/1846 (2%) |
|---------------------------------|---|--------------------------------------------------------------|-----------------------------------------------------------------------------------------------------------------------------------------------------------------------------------------------------------------------------------------------------------------------------------------------------|----|----|----|-------------------------------------------------------------------|--------------|

|                          |   |                                                                                                                  |                                                                                           |    |    |    |             |             |
|--------------------------|---|------------------------------------------------------------------------------------------------------------------|-------------------------------------------------------------------------------------------|----|----|----|-------------|-------------|
| O'Brien et al, 1991 (22) | 5 | HRV in response to<br>1)Supine rest<br>2)Single deep breath<br>3)Valsalva manoeuvre<br>4)Standing for 60 seconds | Defined as heart rate responses below the 2.5th centile in two or more of the four tests. | NA | NA | NA | 23/84 (27%) | 21/422 (5%) |
|--------------------------|---|------------------------------------------------------------------------------------------------------------------|-------------------------------------------------------------------------------------------|----|----|----|-------------|-------------|

|                      |     |                                                                                                                                                                                                                                                                                                                                                                                                                                                                                                                                                                                                                                                |                                                             |                                                                                                                                                                                                                                                                       |             |           |             |           |
|----------------------|-----|------------------------------------------------------------------------------------------------------------------------------------------------------------------------------------------------------------------------------------------------------------------------------------------------------------------------------------------------------------------------------------------------------------------------------------------------------------------------------------------------------------------------------------------------------------------------------------------------------------------------------------------------|-------------------------------------------------------------|-----------------------------------------------------------------------------------------------------------------------------------------------------------------------------------------------------------------------------------------------------------------------|-------------|-----------|-------------|-----------|
| Lee et al, 2003 (19) | 3.8 | <p>1)Deep breathing tests were performed at 6 ventilations/min (abnormal RR-interval ratio &lt;1.11)</p> <p>2)Valsalva manoeuvre were done by having the patient blow at 40 mm Hg for 15 seconds (abnormal RR-interval ratio &lt;1.21)</p> <p>3)Lying-to-standing tests were performed by having the patient move from the standing to the recumbent position (abnormal RR-interval ratio &lt;1.04).</p> <p>4)Postural systolic blood pressure change was measured with the patient in the recumbent position and again after the patient had been in the standing position for 30 seconds (abnormal blood pressure decrease &gt;30 mm Hg)</p> | Defined as the presence of 3 or more abnormal test results. | <p>1)Major cardiac events were defined as either cardiac death as confirmed by review of hospital records</p> <p>2)Nonfatal myocardial infarction as evidenced by the appropriate combination of symptoms, electrocardiographic study results and enzyme changes.</p> | 13/78 (17%) | 0/68 (0%) | 15/78 (19%) | 2/68 (3%) |
|----------------------|-----|------------------------------------------------------------------------------------------------------------------------------------------------------------------------------------------------------------------------------------------------------------------------------------------------------------------------------------------------------------------------------------------------------------------------------------------------------------------------------------------------------------------------------------------------------------------------------------------------------------------------------------------------|-------------------------------------------------------------|-----------------------------------------------------------------------------------------------------------------------------------------------------------------------------------------------------------------------------------------------------------------------|-------------|-----------|-------------|-----------|

|                        |         |                                                                                                                                                      |                                                                                                                                                                                                                       |    |                                                                      |                                                                     |             |            |
|------------------------|---------|------------------------------------------------------------------------------------------------------------------------------------------------------|-----------------------------------------------------------------------------------------------------------------------------------------------------------------------------------------------------------------------|----|----------------------------------------------------------------------|---------------------------------------------------------------------|-------------|------------|
|                        |         | 5)Handgrip tests were measured as the increase in diastolic blood pressure during 30% maximal handgrip (abnormal blood pressure increase <10 mm Hg). |                                                                                                                                                                                                                       |    |                                                                      |                                                                     |             |            |
| Ewing et al, 1980 (18) | 1.6 – 5 | 1)Heart rate responses to the Valsalva manoeuvre<br><br>2)Blood pressure response to sustained handgrip<br><br>3)Postural fall in blood pressure     | Defined as either one or both responses to the Valsalva manoeuvre and sustained handgrip were abnormal, or if both were borderline. Patients with one borderline autonomic function test were designated as 'normal'. | NA | 8/40 (20%)<br>*only cardiovascular events leading to death mentioned | 2/33 (6%)<br>*only cardiovascular events leading to death mentioned | 21/40 (53%) | 5/33 (15%) |

|                      |     |                                                                                                              |                                                                                                                                                                                 |                                                                                                                                                                                                                                                     |                                                                                                                                                                         |                                                                                                                             |    |    |
|----------------------|-----|--------------------------------------------------------------------------------------------------------------|---------------------------------------------------------------------------------------------------------------------------------------------------------------------------------|-----------------------------------------------------------------------------------------------------------------------------------------------------------------------------------------------------------------------------------------------------|-------------------------------------------------------------------------------------------------------------------------------------------------------------------------|-----------------------------------------------------------------------------------------------------------------------------|----|----|
| Cha et al, 2016 (31) | 8.9 | <p>1)E/I ratio</p> <p>2)Responses to the Valsalva manoeuvre</p> <p>3)HR response from lying to standing.</p> | <p>Each measurement was scored as normal = 0 or abnormal = 1</p> <p>Defined as</p> <p>1)Normal autonomic function = 0</p> <p>2)Early CAN = 1</p> <p>3) Definite CAN &gt;= 2</p> | <p>1) Recurrent attack of CVE, which was defined as CVE (MI, non-MI acute coronary syndrome, heart failure, or death attributable to CVE), stroke or limb amputation from diabetic foot, according to World Health Organization (WHO) criteria.</p> | <p>Early CAN: 22/48 (46%)</p> <p>Definite CAN: 43/69 (62%)</p> <p>*2 lower limb amputations included in CVE but does not state if part of CAN population or control</p> | <p>13/42 (31%)</p> <p>*2 lower limb amputations included in CVE but does not state if part of CAN population or control</p> | NA | NA |
|----------------------|-----|--------------------------------------------------------------------------------------------------------------|---------------------------------------------------------------------------------------------------------------------------------------------------------------------------------|-----------------------------------------------------------------------------------------------------------------------------------------------------------------------------------------------------------------------------------------------------|-------------------------------------------------------------------------------------------------------------------------------------------------------------------------|-----------------------------------------------------------------------------------------------------------------------------|----|----|



|                         |            |                                                         |                                                                                                                             |                                                                                                                                                                                                                                                                                                                               |                                                                                                                                                                                                                                     |                                                                                                                                                                                    |                                                                                                                                                                                                |                                                                                                                                                                                   |
|-------------------------|------------|---------------------------------------------------------|-----------------------------------------------------------------------------------------------------------------------------|-------------------------------------------------------------------------------------------------------------------------------------------------------------------------------------------------------------------------------------------------------------------------------------------------------------------------------|-------------------------------------------------------------------------------------------------------------------------------------------------------------------------------------------------------------------------------------|------------------------------------------------------------------------------------------------------------------------------------------------------------------------------------|------------------------------------------------------------------------------------------------------------------------------------------------------------------------------------------------|-----------------------------------------------------------------------------------------------------------------------------------------------------------------------------------|
| Astrup et al, 2006 (24) | 10.1 years | 1)Expiration/Inspiration (E/I) variation in heart rate. | <p>Defined as</p> <p>1) Abnormal: HRV &lt;=10 bpm</p> <p>2) Borderline: HRV 11–14 bpm</p> <p>3) Normal: HRV &gt;=15 bpm</p> | <p>1) Cardiovascular mortality and morbidity. Cardiovascular morbidity was defined as a history of nonfatal myocardial infarction, percutaneous coronary intervention, coronary artery bypass grafting, nonfatal stroke, amputation as a result of ischemia, and vascular surgery for peripheral atherosclerotic disease.</p> | <p>Abnormal HRV: 85/216 (39%)</p> <p>Borderline HRV: 6/65 (9%)</p> <p>*37 total Lower limb amputation /peripheral bypass procedures included in abnormal/borderline/normal HRV group however not stated how many in each groups</p> | <p>6/107 (6%)</p> <p>*37 total Lower limb amputation /peripheral bypass procedures included in abnormal/borderline/normal HRV group however not stated how many in each groups</p> | <p>Abnormal HRV:62/216 (29%)</p> <p>Borderline HRV:7/65 (11%)</p> <p>*37 total Lower limb amputation/peripheral bypass procedures included in abnormal/borderline/normal HRV group however</p> | <p>6/107 (6%)</p> <p>*37 total Lower limb amputation/peripheral bypass procedures included in abnormal/borderline/normal HRV group however not stated how many in each groups</p> |
|-------------------------|------------|---------------------------------------------------------|-----------------------------------------------------------------------------------------------------------------------------|-------------------------------------------------------------------------------------------------------------------------------------------------------------------------------------------------------------------------------------------------------------------------------------------------------------------------------|-------------------------------------------------------------------------------------------------------------------------------------------------------------------------------------------------------------------------------------|------------------------------------------------------------------------------------------------------------------------------------------------------------------------------------|------------------------------------------------------------------------------------------------------------------------------------------------------------------------------------------------|-----------------------------------------------------------------------------------------------------------------------------------------------------------------------------------|

|                        |    |                                                                                                                                                                            |    |    |                                               |                                           |                                                                                                         |                                             |
|------------------------|----|----------------------------------------------------------------------------------------------------------------------------------------------------------------------------|----|----|-----------------------------------------------|-------------------------------------------|---------------------------------------------------------------------------------------------------------|---------------------------------------------|
|                        |    |                                                                                                                                                                            |    |    |                                               |                                           | er not stated how many in each groups                                                                   |                                             |
| Lykke et al, 2008 (26) | 10 | 1)Heart rate response to deep breathing<br><br>*RR and QT intervals were also measured in all leads in three consecutive periods and a mean value for each was calculated. | NA | NA | Combined HRV and QTc (abnormal) : 14/34 (41%) | Combined HRV and QTc (normal): 1/100 (1%) | Combi ned HRV and QTc (abnor mal): 15/34 (44%)<br><br>Combi ned HRV and QTc (border line):4 4/257 (17%) | Combin ed HRV and QTc (normal) : 3/100 (3%) |

|                        |     |             |                                                                                            |                                                                                                                                                                                                                                                                                                                                                                            |                                        |                                        |    |    |
|------------------------|-----|-------------|--------------------------------------------------------------------------------------------|----------------------------------------------------------------------------------------------------------------------------------------------------------------------------------------------------------------------------------------------------------------------------------------------------------------------------------------------------------------------------|----------------------------------------|----------------------------------------|----|----|
| Cohen et al, 2003 (23) | 5.3 | 1)E/I ratio | Defined as normal, abnormal or borderline based on age-related range values (Smith, 1982). | <p>1) Death due to cardiovascular events (sudden death, progressive heart failure, fatal myocardial infarction, fatal arrhythmias, cerebral vascular accidents and ruptured aortic aneurysm)</p> <p>2)Non-fatal myocardial infarction</p> <p>3)Non-fatal cerebral vascular accident</p> <p>4)Heart failure requiring hospital admission</p> <p>5)Pulmonary infarction.</p> | <p>26/405 (6%)</p> <p>*All strokes</p> | <p>14/467 (3%)</p> <p>*All strokes</p> | NA | NA |
|------------------------|-----|-------------|--------------------------------------------------------------------------------------------|----------------------------------------------------------------------------------------------------------------------------------------------------------------------------------------------------------------------------------------------------------------------------------------------------------------------------------------------------------------------------|----------------------------------------|----------------------------------------|----|----|

|                          |          |                                                                                                                                                                                                                                                                                                                                                                                |                                                                                                                   |                                                                                                                                                                                                                  |                            |                          |                                               |            |
|--------------------------|----------|--------------------------------------------------------------------------------------------------------------------------------------------------------------------------------------------------------------------------------------------------------------------------------------------------------------------------------------------------------------------------------|-------------------------------------------------------------------------------------------------------------------|------------------------------------------------------------------------------------------------------------------------------------------------------------------------------------------------------------------|----------------------------|--------------------------|-----------------------------------------------|------------|
| Okada et al, 2010 (29)   | 4.7      | 1) Baroreceptor sensitivity (BRS) was assessed using the phenylephrine method. BRS was calculated as the slope of the linear regression line relating the systolic BP changes to the RR interval changes.                                                                                                                                                                      | NA                                                                                                                | 1)Major adverse cardiovascular event (MACE), which included cardiovascular mortality, nonfatal MI, coronary revascularization by angioplasty or bypass, stroke and congestive heart failure requiring admission. | Depressed BRS: 15/85 (18%) | Preserved BRS: 4/99 (4%) | NA                                            | NA         |
| Navarro et al, 1996 (34) | 1 – 11.5 | 1)Heart rate was monitored continuously during slow breathing at 6/min. The averaged difference between the highest heart rate with inspiration and the lowest rate with expiration during seven consecutive breathing cycles was called the AR6.<br><br>2)Valsalva ratio<br><br>(Normal limits were established for the age group examined (AR6 $\geq$ 15.0; VR $\geq$ 1.43). | Defined as<br><br>1)CRR 0: both tests normal<br><br>2)CRR 1: one test abnormal<br><br>3)CRR 2: two tests abnormal | NA                                                                                                                                                                                                               | NA                         | NA                       | CRR 1: 9/58 (16%)<br><br>CRR 2: 101/359 (28%) | 6/128 (5%) |

|                          |                                                                |                                                                                                                                                                                                                                                                                                                                                                                                                        |                                                                                                                                                                                                                                  |                 |                                                   |                                           |                                                     |                           |
|--------------------------|----------------------------------------------------------------|------------------------------------------------------------------------------------------------------------------------------------------------------------------------------------------------------------------------------------------------------------------------------------------------------------------------------------------------------------------------------------------------------------------------|----------------------------------------------------------------------------------------------------------------------------------------------------------------------------------------------------------------------------------|-----------------|---------------------------------------------------|-------------------------------------------|-----------------------------------------------------|---------------------------|
| Sampson et al, 1990 (21) | 10 – 15                                                        | <p>1)Initially at this time the heart rate variability on deep respiration at six cycles/min, was the only test in common use.</p> <p>The repeat tests of autonomic function were the heart rate variability on deep breathing at six cycles/min, the heart rate responses to the Valsalva manoeuvre (Valsalva ratio) and the heart rate and systolic blood pressure responses to standing as described elsewhere.</p> | <p>Group A: Early symptomatic autonomic neuropathy and an abnormal HRV (5.6 +/- 0.5)</p> <p>Group B: Abnormal HRV (7.6 +/-0.5) alone</p> <p>Group C: An asymptomatic control group with a normal HRV of 16-26 (20.8 +/- 0.5)</p> | NA              | <p>Group A:4/49 (8%)</p> <p>Group B:0/24 (0%)</p> | <p>Group C:0/38 (0%)</p>                  | <p>Group A:18/49 (37%)</p> <p>Group B:2/24 (8%)</p> | <p>Group C:4/38 (11%)</p> |
| Töyry et al, 1996 (14)   | <p>5, 10</p> <p>*Stroke only assessed at 10 year follow-up</p> | <p>1) E/I ratio (Parasympathetic test at baseline and at 5-year examination)</p> <p>2) Blood pressure response to standing (Sympathetic test at 5-year examination)</p>                                                                                                                                                                                                                                                | NA                                                                                                                                                                                                                               | 1)First strokes | Parasympathetic neuropathy : 6/19 (32%)           | No Parasympathetic neuropathy : 5/77 (6%) | NA                                                  | NA                        |

|                          |   |                                                                                                                                                                                                                         |                                                                                   |    |                                                                    |                                                                      |             |             |
|--------------------------|---|-------------------------------------------------------------------------------------------------------------------------------------------------------------------------------------------------------------------------|-----------------------------------------------------------------------------------|----|--------------------------------------------------------------------|----------------------------------------------------------------------|-------------|-------------|
| Veglio et al, 2000 (38)  | 5 | 1) Heart rate response to deep breathing<br>2) Blood pressure response to standing<br>3) Heart rate (resting)                                                                                                           | Defined as 2 or more abnormal results for the cardiovascular tests and heart rate | NA | NA                                                                 | NA                                                                   | 10/75 (13%) | 10/241 (4%) |
| Ziegler et al, 2008 (17) | 9 | 1) Time domain measures including the standard deviation of R-R intervals (SDNN), coefficient of variation (CV) of R-R intervals, and the difference between the maximum and minimum R-R interval (max-min difference). | NA                                                                                | NA | max-min R-R interval difference at the first quartile: 30/79 (38%) | max-min R-R interval difference at the 2nd-4th quartile: 19/80 (24%) | NA          | NA          |
| Sawicki et al, 1996 (36) | 9 | 1) RR variation between supine and standing position                                                                                                                                                                    | Defined as RR <sub>supine</sub> /RR <sub>standing</sub> below 1.03                | NA | 16/26 (62%)                                                        | 17/59 (29%)                                                          | NA          | NA          |

|                          |         |                                                      |                                                                    |                                                                                                                                                                        |             |             |             |               |
|--------------------------|---------|------------------------------------------------------|--------------------------------------------------------------------|------------------------------------------------------------------------------------------------------------------------------------------------------------------------|-------------|-------------|-------------|---------------|
| Young et al, 2009 (27)   | 4.8     | 1) Heart rate response to standing                   | Defined as lowest quartile of heart rate response to standing test | 1) Nonfatal myocardial infarction<br><br>2) Cardiac death (fatal myocardial infarction within 30 days, death due to heart failure, arrhythmia or sudden cardiac death) | 17/245 (7%) | 15/878 (2%) | NA          | NA            |
| Sawicki et al, 1998 (37) | 15 – 16 | 1) RR variation between supine and standing position | Defined as RR <sub>supine</sub> /RR <sub>standing</sub> below 1.03 | NA                                                                                                                                                                     | NA          | NA          | 58/84 (69%) | 100/132 (76%) |

|                            |     |                                                                                                                                                                                                                                                                                                                                   |                                                                                                                                                                                                                                                                                                                                                                                                                                |                                                                                                                                                                                                                                                                                                                                                     |                                                           |                                                       |                          |                      |
|----------------------------|-----|-----------------------------------------------------------------------------------------------------------------------------------------------------------------------------------------------------------------------------------------------------------------------------------------------------------------------------------|--------------------------------------------------------------------------------------------------------------------------------------------------------------------------------------------------------------------------------------------------------------------------------------------------------------------------------------------------------------------------------------------------------------------------------|-----------------------------------------------------------------------------------------------------------------------------------------------------------------------------------------------------------------------------------------------------------------------------------------------------------------------------------------------------|-----------------------------------------------------------|-------------------------------------------------------|--------------------------|----------------------|
| Pop-Busui et al, 2010 (28) | 3.5 | <p>1) Resting heart rate</p> <p>2) SD of normally conducted R-R intervals (SDNN).</p> <p>*From simultaneous lead recordings, QT intervals were measured, and the QT index (QTI) was calculated as observed/predicted QT duration where predicted value was based on Bazett's correction (<math>QT_c = QT/R - R^{1/2}</math>).</p> | <p>Defined as</p> <p>1) CAN1: lowest quartile of SDNN (&lt;7.815 ms) and the highest quartile of QTI (&gt;104.32%)</p> <p>2) CAN2: lowest quartile of SDNN and the highest quartiles of QTI and resting heart rate</p> <p>3) CAN3: lowest quartile of SDNN and the highest quartiles of QTI and heart rate, in the presence of diabetic peripheral neuropathy .</p> <p>*CAN1 was the definition used for our meta-analysis</p> | <p>1) Death from CVE included deaths from myocardial infarction, heart failure, arrhythmia, invasive cardiovascular interventions, cardiovascular causes after non-cardiovascular surgery, stroke, unexpected death presumed to be from ischemic CVE occurring within 24 h after the onset of symptoms, and death from other vascular diseases.</p> | <p>CAN1: 23/572 (4%)</p> <p>*Cardiovascular mortality</p> | <p>140/7563 (2%)</p> <p>*Cardiovascular mortality</p> | <p>CAN1: 38/572 (7%)</p> | <p>291/7563 (4%)</p> |
|----------------------------|-----|-----------------------------------------------------------------------------------------------------------------------------------------------------------------------------------------------------------------------------------------------------------------------------------------------------------------------------------|--------------------------------------------------------------------------------------------------------------------------------------------------------------------------------------------------------------------------------------------------------------------------------------------------------------------------------------------------------------------------------------------------------------------------------|-----------------------------------------------------------------------------------------------------------------------------------------------------------------------------------------------------------------------------------------------------------------------------------------------------------------------------------------------------|-----------------------------------------------------------|-------------------------------------------------------|--------------------------|----------------------|



|                           |      |                                                                                                 |                                                                                                                         |    |                                                             |                                               |                                     |                            |
|---------------------------|------|-------------------------------------------------------------------------------------------------|-------------------------------------------------------------------------------------------------------------------------|----|-------------------------------------------------------------|-----------------------------------------------|-------------------------------------|----------------------------|
| Rathmann et al, 1993 (35) | 8    | 1)Heart rate variation at rest<br>2)Heart rate variation at deep breathing                      | Defined as both parameters below two standard deviations of an age-corrected mean value of a non-diabetic control group | NA | 2/35 (6%)<br><br>*death by myocardial infarction and stroke | 1/35 (3%)<br><br>*death by cardiac arrhythmia | 8/35 (23%)                          | 1/35 (3%)                  |
| Ewing et al, 1976 (16)    | 2.75 | 1)Valsalva manouvre<br>2)BP response to sustained handgrip<br>3)Postural drop in blood pressure | NA                                                                                                                      | NA | NA                                                          | NA                                            | 1 or both AFT abnormal: 10/20 (50%) | Both AFT normal: 0/17 (0%) |

|                           |   |                                                                                                                                                                                           |                                                                                                                                                                                                                                                                                                                                                                                                                                                                                                       |    |    |    |                                                                 |           |
|---------------------------|---|-------------------------------------------------------------------------------------------------------------------------------------------------------------------------------------------|-------------------------------------------------------------------------------------------------------------------------------------------------------------------------------------------------------------------------------------------------------------------------------------------------------------------------------------------------------------------------------------------------------------------------------------------------------------------------------------------------------|----|----|----|-----------------------------------------------------------------|-----------|
| Jermendy et al, 1991 (33) | 5 | <p>1)Valsalva ratio (Parasympathetic)</p> <p>2)30:15 ratio (Parasympathetic)</p> <p>3)Postural drop in blood pressure (sympathetic)</p> <p>4)Beat to beat variation (Parasympathetic)</p> | <p>Defined as</p> <p>Normal: 0 score for parasympathetic tests</p> <p>Borderline: 1 score for parasympathetic tests</p> <p>Abnormal: 2 score for parasympathetic tests</p> <p>*The patients were then assigned an autonomic function score from 0 to 6 and 3 groups were formed as patients without CAN (total score 0-1), patients with early (total score 2-3) and definitive (total score 4-6) signs of CAN</p> <p>*Classification of patients was carried out on the basis of parasympathetic</p> | NA | NA | NA | <p>Early CAN: 2/13 (15%)</p> <p>Definitive CAN: 10/17 (59%)</p> | 1/23 (4%) |
|---------------------------|---|-------------------------------------------------------------------------------------------------------------------------------------------------------------------------------------------|-------------------------------------------------------------------------------------------------------------------------------------------------------------------------------------------------------------------------------------------------------------------------------------------------------------------------------------------------------------------------------------------------------------------------------------------------------------------------------------------------------|----|----|----|-----------------------------------------------------------------|-----------|

|  |  |  |                                                                         |  |  |  |  |  |
|--|--|--|-------------------------------------------------------------------------|--|--|--|--|--|
|  |  |  | functional tests because no sympathetic function proved to be abnormal. |  |  |  |  |  |
|--|--|--|-------------------------------------------------------------------------|--|--|--|--|--|

\* AFT, autonomic function test; CAN, cardiac autonomic neuropathy; CAN+, cardiac autonomic neuropathy positive; CAN-, cardiac autonomic neuropathy negative; CVE, cardiovascular disease events; CRR, cardiorespiratory reflex; HRV, heart rate variation; NA, information not available; QTc, corrected QT interval; SD, standard deviation.

**ESM Table 5** Participant metabolic characteristic from all final selected articles

| Study                      | Population HbA1c (IFC mmol/mol or DCCT %)                                                    | Population fasting glucose (default is mmol/L, apart from where stated mg/dL) | Population eGFR (ml/min/1.73 m <sup>2</sup> ) | Population creatinine clearance (mL/min, apart from where stated mL/s or mmol/L) | Population albuminuria (mg/mmol, apart from where stated mg/24h, g/24h or mg/day )                                                                                                                                                                                         | Population lipids (mg/dL or mmol/L)                                                                                                                                   |
|----------------------------|----------------------------------------------------------------------------------------------|-------------------------------------------------------------------------------|-----------------------------------------------|----------------------------------------------------------------------------------|----------------------------------------------------------------------------------------------------------------------------------------------------------------------------------------------------------------------------------------------------------------------------|-----------------------------------------------------------------------------------------------------------------------------------------------------------------------|
| Ko et al, 2008 (25)        | 9.0+/-2.2%                                                                                   | NA                                                                            | NA                                            | NA                                                                               | NA                                                                                                                                                                                                                                                                         | NA                                                                                                                                                                    |
| Pop-Busui et al, 2017 (15) | CAN-: 66.0+/-17.0 mmol/mol (8.2+/-1.6 %)<br><br>CAN+: 74.0 +/- 20.0 mmol/mol (8.9 +/- 1.8 %) | NA                                                                            | NA                                            | NA                                                                               | Sustained microalbuminuria (Sustained AER 30 mg/24h or more at two consecutive visits or ESRD defined as dialysis or renal transplantation):<br>CAN-: n=114<br><br>CAN+: n=35<br><br>Macroalbuminuria (AER 300 mg/24h or more, or ESRD):<br>Control: n=18<br><br>CAN: n=11 | CAN-:<br>Triglycerides 84.0+/-47.0 mg/dL, total cholesterol 181.0+/-33.0 mg/dL<br><br>CAN+:<br>Triglycerides 100.0+/-58.0 mg/dL, total cholesterol 190.0+/-42.0 mg/dL |

|                          |                                                                              |                           |                                                                      |    |                                                                                                    |                                                                                                                                                                                                                  |
|--------------------------|------------------------------------------------------------------------------|---------------------------|----------------------------------------------------------------------|----|----------------------------------------------------------------------------------------------------|------------------------------------------------------------------------------------------------------------------------------------------------------------------------------------------------------------------|
| O'Brien et al, 1991 (22) | NA                                                                           | NA                        | NA                                                                   | NA | NA                                                                                                 | CAN- cholesterol = 5.2 mmol/L<br><br>CAN+ cholesterol = 5.6 mmol/L                                                                                                                                               |
| Cha et al, 2016 (31)     | Whole cohort: 73.9+/-23.0 mmol/mol                                           | Whole cohort: 9.87+/-4.51 | Whole cohort: 83.1+/-18.0                                            | NA | Whole cohort: 13.0 (7.0–54.9) mg/day                                                               | Whole cohort: HDL 1.07+/-0.30 mmol/L, LDL 2.85+/-0.85 mmol/L                                                                                                                                                     |
| Astrup et al, 2006 (24)  | Diabetic nephropathy: 9.5 %+/-1.5<br><br>No diabetic nephropathy: 8.5%+/-1.1 | NA                        | Diabetic nephropathy: 74.0+/-34.0<br><br>No diabetic nephropathy: NA | NA | Diabetic nephropathy: 796.0 (16–14,565) mg/24hr<br><br>No diabetic nephropathy: 8.0 (1–30) mg/24hr | Diabetic nephropathy: HDL 1.46+/-0.5, LDL 3.54+/-1.1 mmol/L, Triglycerides 1.22 (0.3–9.8) mmol/L<br><br>No diabetic nephropathy: HDL 1.56 +/- 0.4, LDL 2.82 +/- 0.9 mmol/L, Triglycerides 0.77 (0.28–3.1) mmol/L |

|                          |                                                                            |                                                                        |    |    |                                                                                                                                                  |                                                                                                                                                                                                                                                      |
|--------------------------|----------------------------------------------------------------------------|------------------------------------------------------------------------|----|----|--------------------------------------------------------------------------------------------------------------------------------------------------|------------------------------------------------------------------------------------------------------------------------------------------------------------------------------------------------------------------------------------------------------|
| Lykke et al, 2008 (26)   | Normoalbuminuric group: 8.49+/-1.09%<br><br>Nephropathy group: 9.56+/-1.5% | NA                                                                     | NA | NA | Normoalbuminuric group: Urinary albumin excretion 10.2 (range 1-40) mg/24h<br><br>Nephropathy: Urinary albumin excretion 1,609 (16-14545) mg/24h | Normoalbuminuric group: Cholesterol 4.76+/-0.98 mmol/L, HDL 1.56+/-0.51 mmol/L, Triglycerides 0.83 (range 0.28-3.05) mmol/L<br><br>Nephropathy group: Cholesterol: 5.64+/-1.22, HDL: 1.46+/-0.54 mmol/L, Triglycerides 1.41 (range 0.31–9.87) mmol/L |
| Okada et al, 2010 (29)   | Preserved BRS = 8.1+/-1.8%<br><br>Depressed BRS = 8.3+/-1.9%               | Preserved BRS: 147.0+/-45.0 mg/dL<br>Depressed BRS: 159.0+/-53.0 mg/dL | NA | NA | NA                                                                                                                                               | NA                                                                                                                                                                                                                                                   |
| Ziegler et al, 2008 (17) | NA                                                                         | NA                                                                     | NA | NA | NA                                                                                                                                               | Whole cohort: total cholesterol 254.2+/-55.0 mg/dL, LDL: 161.5+/-45.1, HDL 49.3+/-15.4                                                                                                                                                               |

|                           |                                                                         |    |    |                                                   |                                                            |                                                                                                                                                    |
|---------------------------|-------------------------------------------------------------------------|----|----|---------------------------------------------------|------------------------------------------------------------|----------------------------------------------------------------------------------------------------------------------------------------------------|
| Sawicki et al, 1996 (36)  | Whole cohort: 8.9+/-2.0%                                                | NA | NA | Whole cohort: 1.08 (range 0.73-1.36) mL/s *median | NA                                                         | Whole cohort: 6.9+/-1.7 mmol/L                                                                                                                     |
| Young et al, 2009 (27)    | No screening group (n=562): 7.0+/-1.5%<br>Screening (n=561): 7.2+/-1.6% | NA | NA | NA                                                | NA                                                         | No screening (n=562): Triglycerides 168.0+/-101.0 mg/dL<br>Screening (n=561): Triglycerides 172.0+/-118.0 mg/dL                                    |
| Sawicki et al, 1998 (37)  | Whole cohort: 8.9% (8.1-10.5) *median (interquartile range)             | NA | NA | NA                                                | NA                                                         | Whole cohort: total cholesterol 6.1 (interquartile range 5.2-6.9) mmol/L                                                                           |
| Rathmann et al, 1993 (35) | CAN-: 10.5+/-1.4%<br>CAN+: 11.6+/-1.0%                                  | NA | NA | CAN-: 59.2 +/- 9.7<br>CAN+: 68.7 +/- 8.8          | CAN- proteinuria: 0.06g/24h<br>CAN+ proteinuria: 0.15g/24h | CAN- triglycerides: 1.56+/-0.59 mmol/L, cholesterol 5.60+/-1.22 mmol/L<br>CAN+ triglycerides: 2.41+/-1.35 mmol/L, cholesterol 6.11 +/- 1.27 mmol/L |

|                           |                                       |    |    |                                              |    |    |
|---------------------------|---------------------------------------|----|----|----------------------------------------------|----|----|
| Jermendy et al, 1991 (33) | Total diabetic population: 7.1+/-0.2% | NA | NA | Total diabetic population: 87.0+/-4.0 mmol/L | NA | NA |
|---------------------------|---------------------------------------|----|----|----------------------------------------------|----|----|

\* AER, albumin excretion rate; BRS, baroreflex sensitivity; CAN, cardiac autonomic neuropathy; CAN+, cardiac autonomic neuropathy positive; CAN-, cardiac autonomic neuropathy negative; eGFR, estimated glomerular filtration rate; ESRD, end stage renal disease; HDL, high density lipoprotein; LDL, low density lipoprotein; NA, information not available

\* Studies without reported metabolic characteristics: Chen et al, 2001 (32), Vujosevic et al, 2012 (30), Valensi et al, 2001 (20), Soedamah-Muthu et al, 2008 (13), Lee et al, 2003 (19), Ewing et al, 1980 (18), Cohen et al, 2003 (23), Navarro et al, 1996 (34), Sampson et al, 1990 (21), Töyry et al. 1996 (14), Veglio et al, 2000 (38), Pop-Busui et al, 2010 (28), Ewing et al, 1976 (16)



**ESM Table 6** Summary of the overall risk of bias assessment

| <b>Study</b>                    | <b>Overall risk of bias</b> |
|---------------------------------|-----------------------------|
| Chen et al, 2001 (33)           | Moderate                    |
| Ko et al, 2008 (26)             | Moderate                    |
| Pop-Busui et al, 2017 (16)      | Low                         |
| Vujosevic et al, 2012 (31)      | Moderate                    |
| Valensi et al, 2001 (21)        | Moderate                    |
| Soedamah-Muthu et al, 2008 (14) | Moderate                    |
| O'Brien et al, 1991 (23)        | Serious                     |
| Lee et al, 2003 (20)            | Moderate                    |
| Ewing et al, 1980 (19)          | Low                         |
| Cha et al, 2016 (32)            | Moderate                    |
| Astrup et al, 2006 (25)         | Moderate                    |
| Lykke et al, 2008 (27)          | Moderate                    |
| Cohen et al, 2003 (24)          | Moderate                    |
| Okada et al, 2010 (30)          | Moderate                    |
| Navarro et al, 1996 (35)        | Serious                     |
| Sampson et al, 1990 (22)        | Moderate                    |
| Töyry et al. 1996 (15)          | Moderate                    |

|                            |          |
|----------------------------|----------|
| Veglio et al, 2000 (39)    | Moderate |
| Ziegler et al, 2008 (18)   | Moderate |
| Sawicki et al, 1996 (37)   | Moderate |
| Young et al, 2009 (28)     | Moderate |
| Sawicki et al, 1998 (38)   | Moderate |
| Pop-Busui et al, 2010 (29) | Moderate |
| Rathmann et al, 1993 (36)  | Serious  |
| Ewing et al, 1976 (17)     | Moderate |
| Jermendy et al, 1991 (34)  | Moderate |

ESM Figure 1 Prisma flowchart demonstrating the article screening process

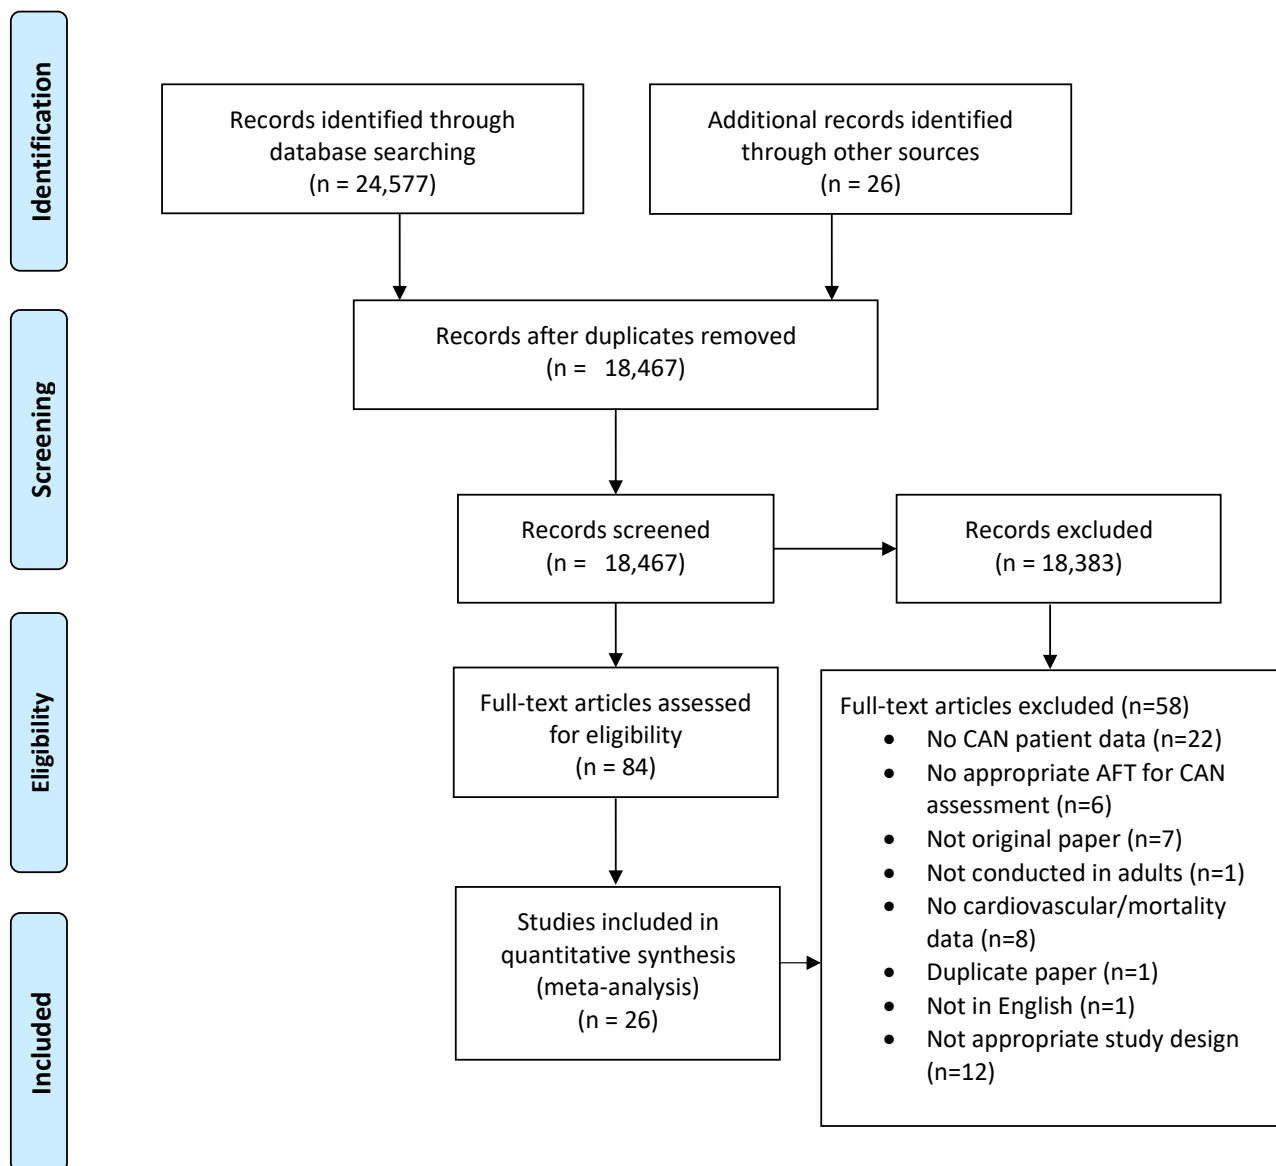

**ESM Figure 2 A** Forest plot including relative risk and 95% CI for subgroup analyses with cardiac autonomic neuropathy and cardiovascular disease events based on the aetiology of diabetes.

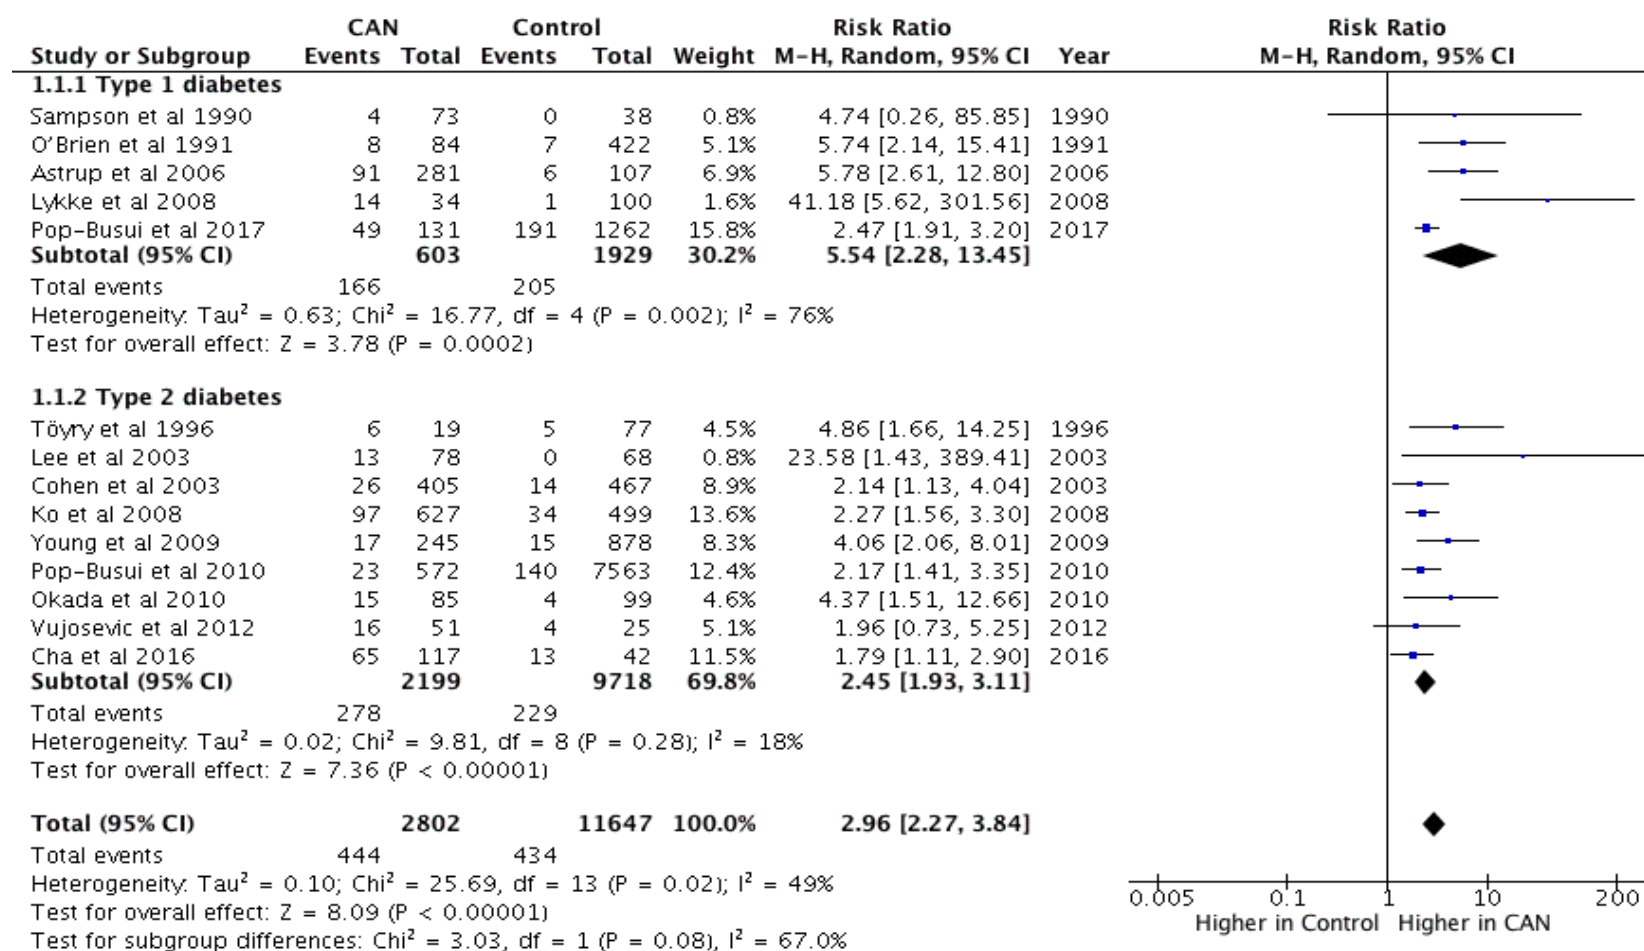

**ESM Figure 3 A** Forest plot including relative risk and 95% CI for subgroup analyses of studies with cardiac autonomic neuropathy and future cardiovascular disease events based on number of autonomic function test abnormalities (1 vs  $\geq 2$  abnormalities).

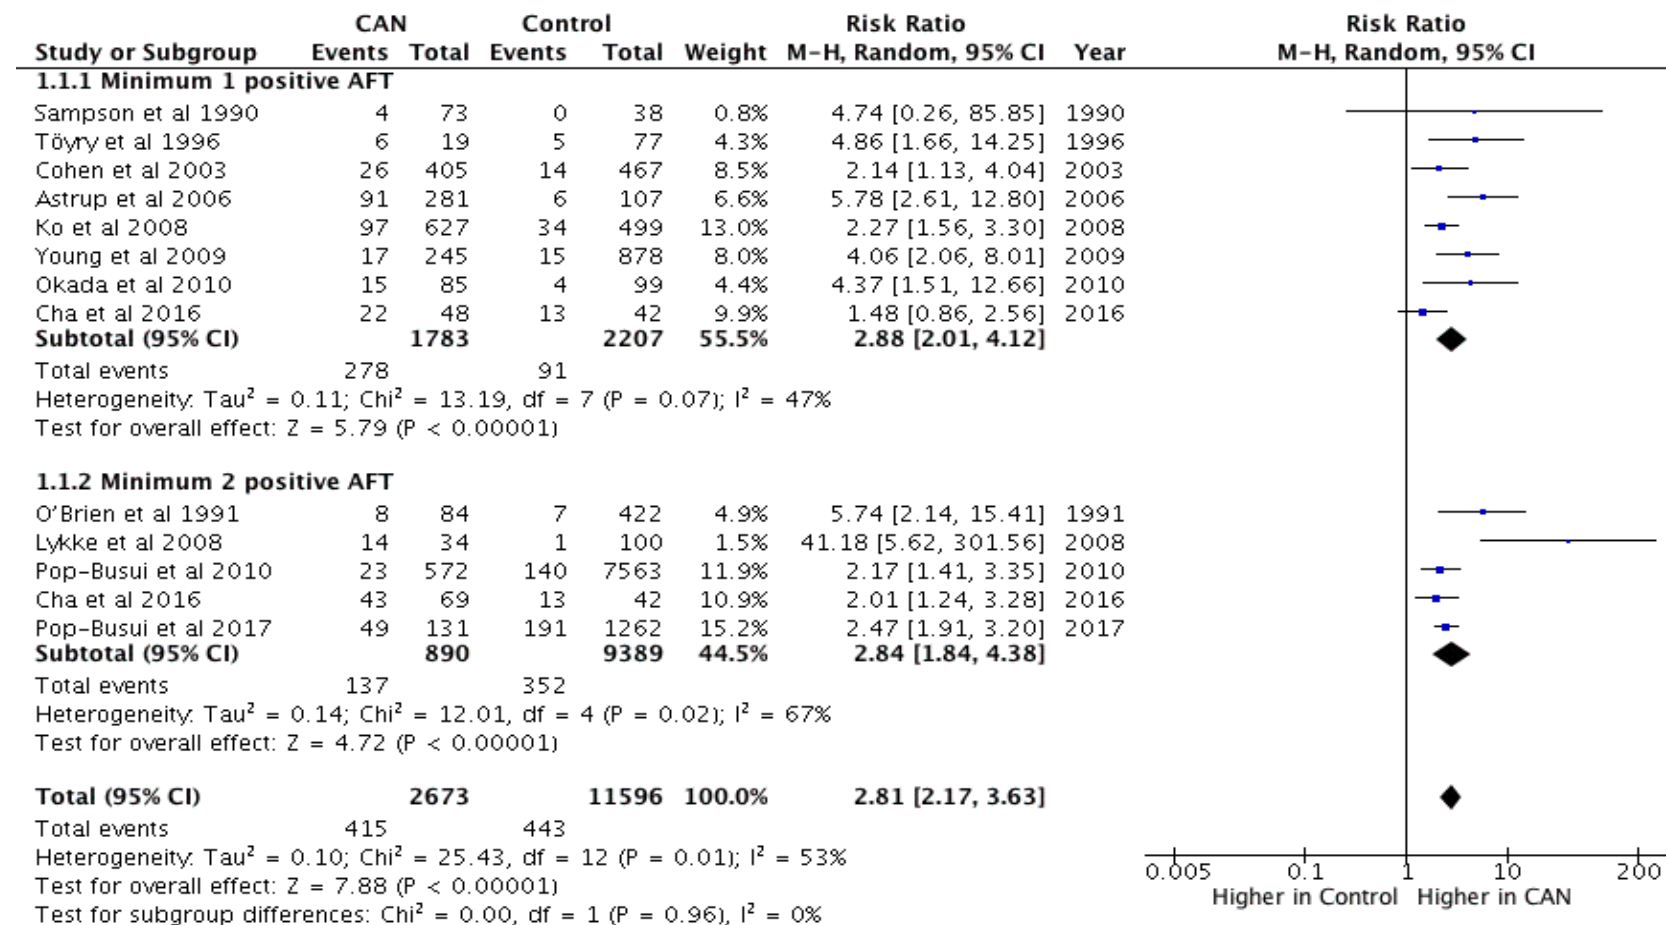

**ESM Figure 4 A** Forest plot including relative risk and 95% CI for subgroup analyses of studies with cardiac autonomic neuropathy and all-cause mortality based on the aetiology of diabetes.

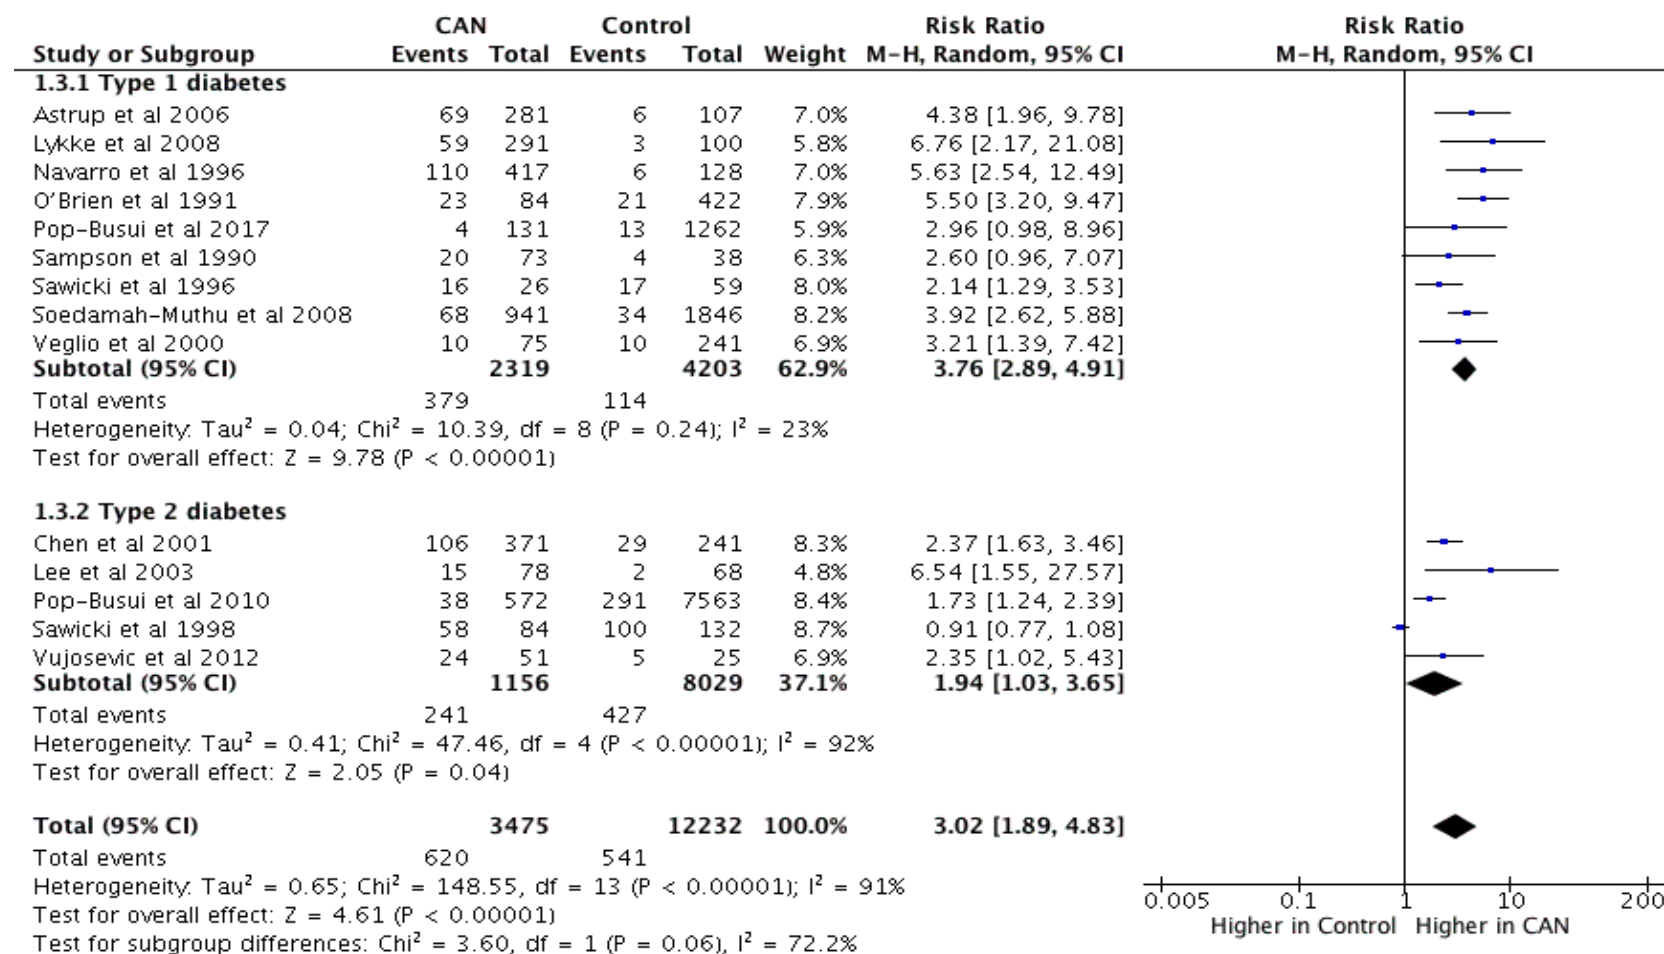

**ESM Figure 5 A** Forest plot including relative risk and 95% CI for sensitivity analysis of studies with cardiac autonomic neuropathy and future cardiovascular events after removing three studies at high risk of bias.

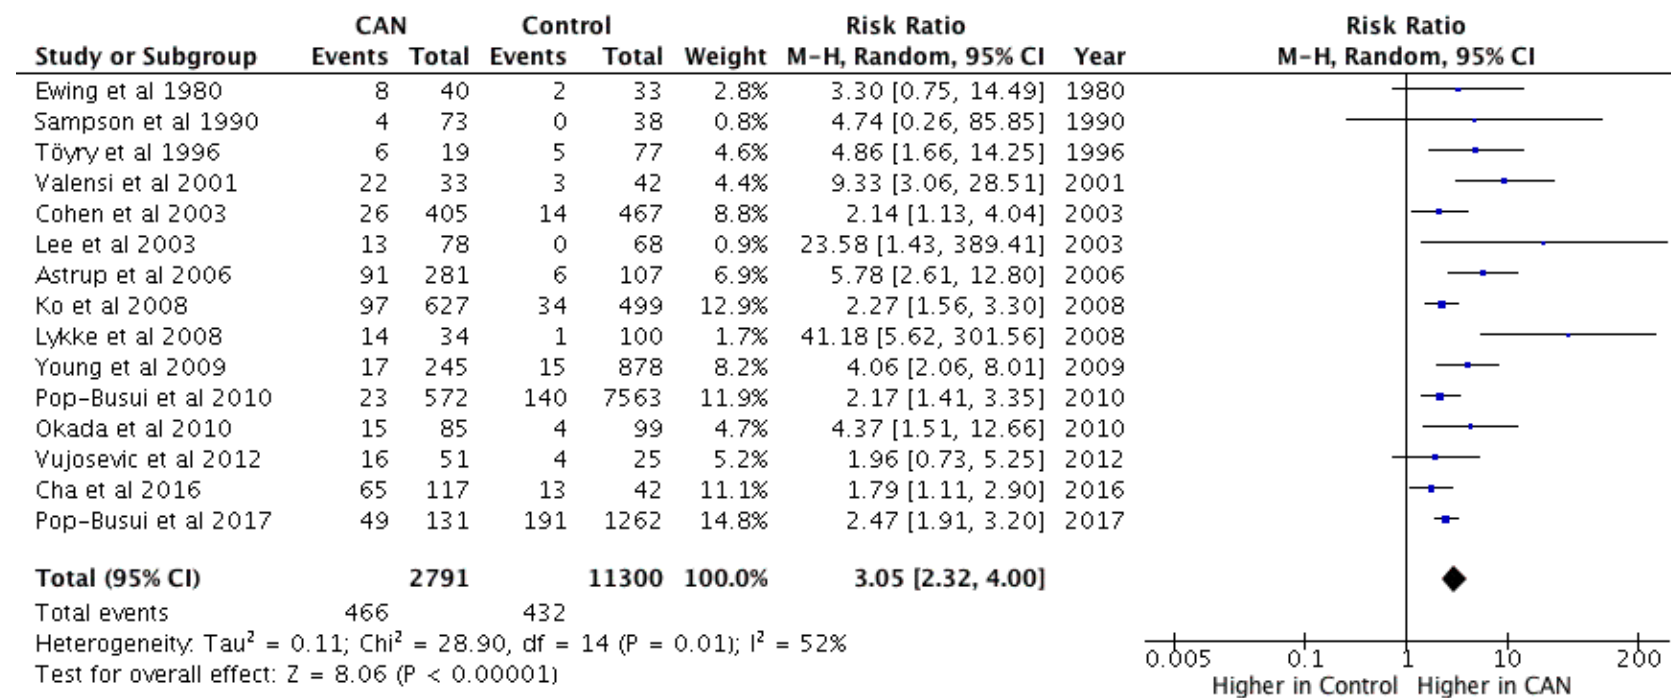

**ESM Figure 6 A** Forest plot including relative risk and 95% CI for sensitivity analysis of studies with cardiac autonomic neuropathy and all-cause mortality after removing three studies at high risk of bias.

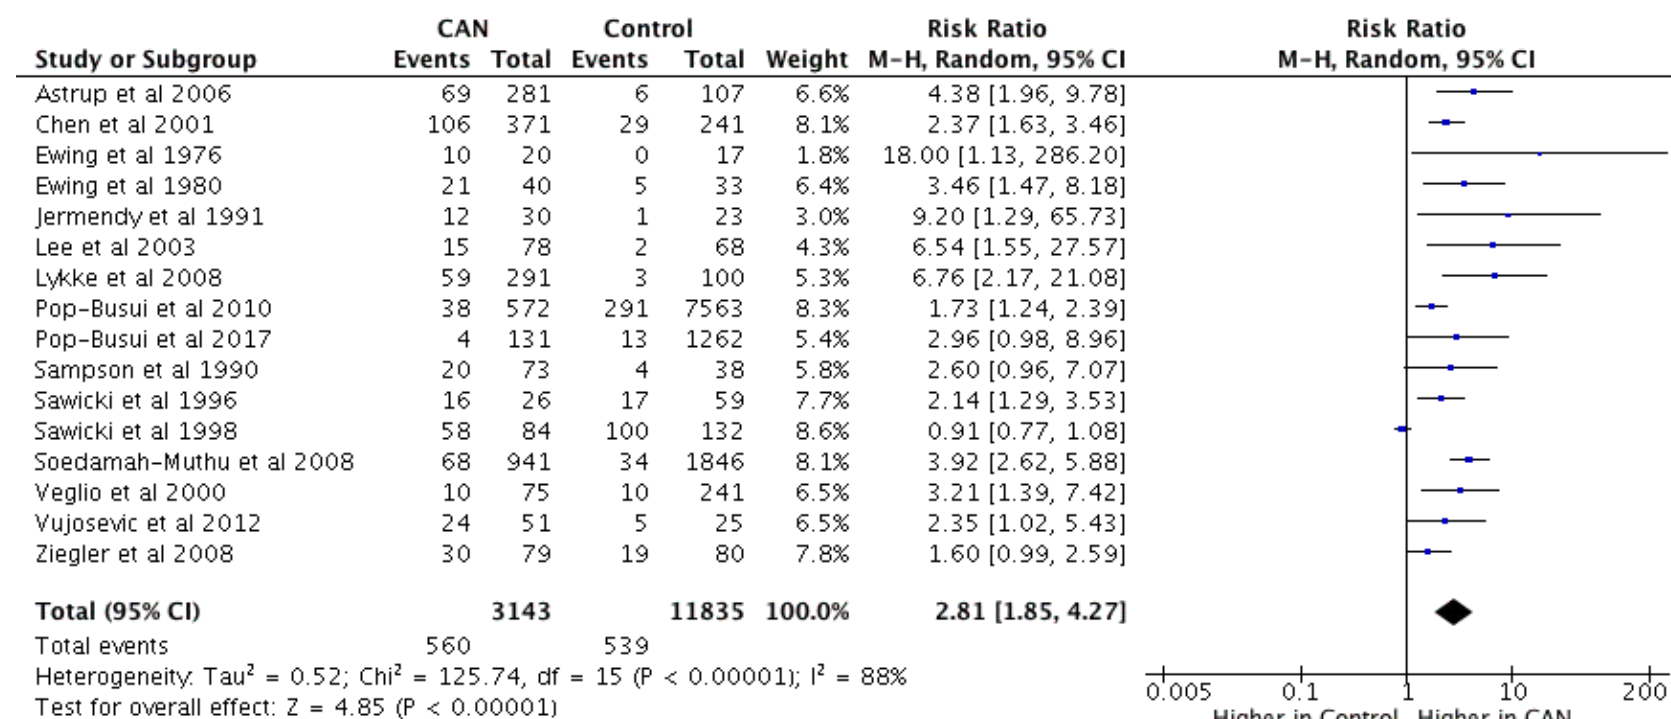

Supplement: bmjdrc-2021-002480supp001_data_supplement.pdf [file bmjdrc-2021-002480supp001_data_supplement.pdf]
